# Supplementary material for: Poly(lactic acid)/poly(ethylene glycol) block copolymer based shell or core cross-linked micelles for controlled release of hydrophobic drug
Source: Royal Society of Chemistry journal article supplement (doi:10.1039/c4ra14376k), 2015-01-01
Supplement: c4ra14376k1.pdf [file c4ra14376k1.pdf]

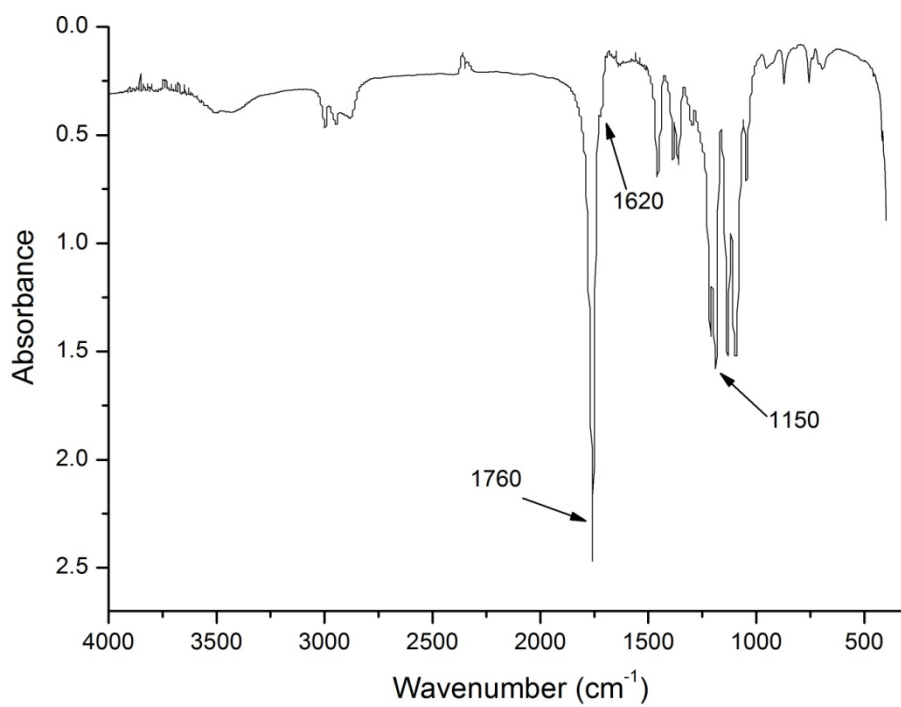

Fig. S1 FTIR spectrum of PLA-PEG methacrylate copolymer

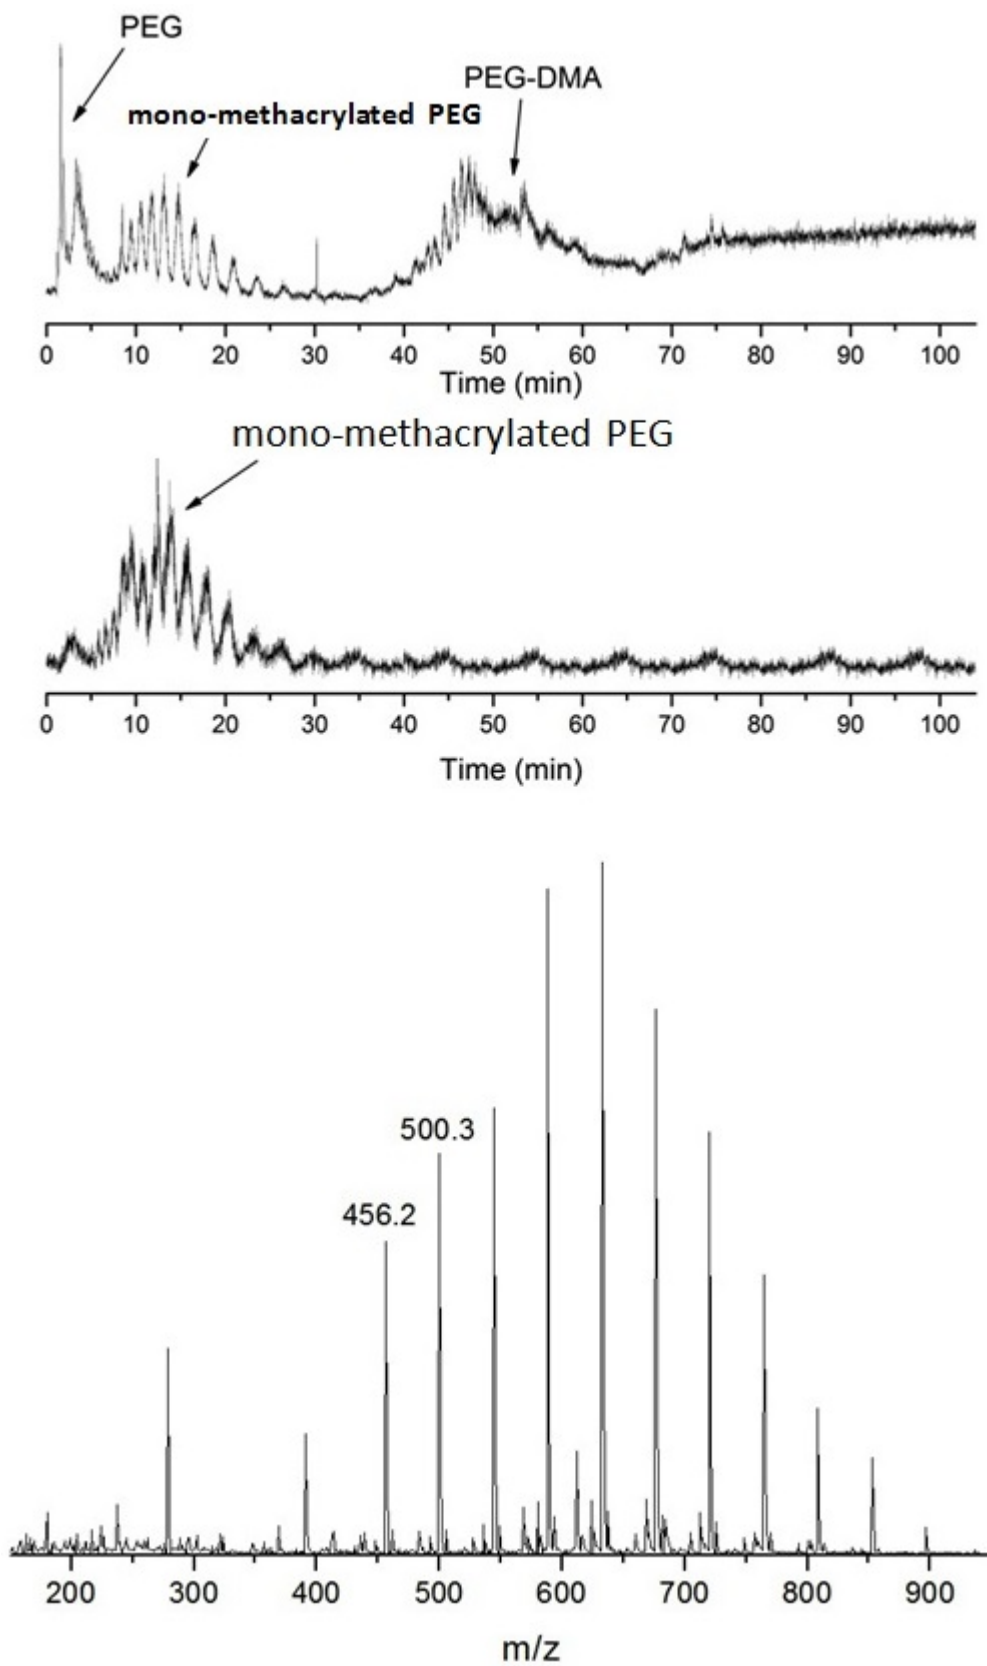

Fig. S2 (A) HPLC chromatograms of PEG-MIX and mono-methacrylate PEG, (B) Mass spectroscopy of PEG-MMA

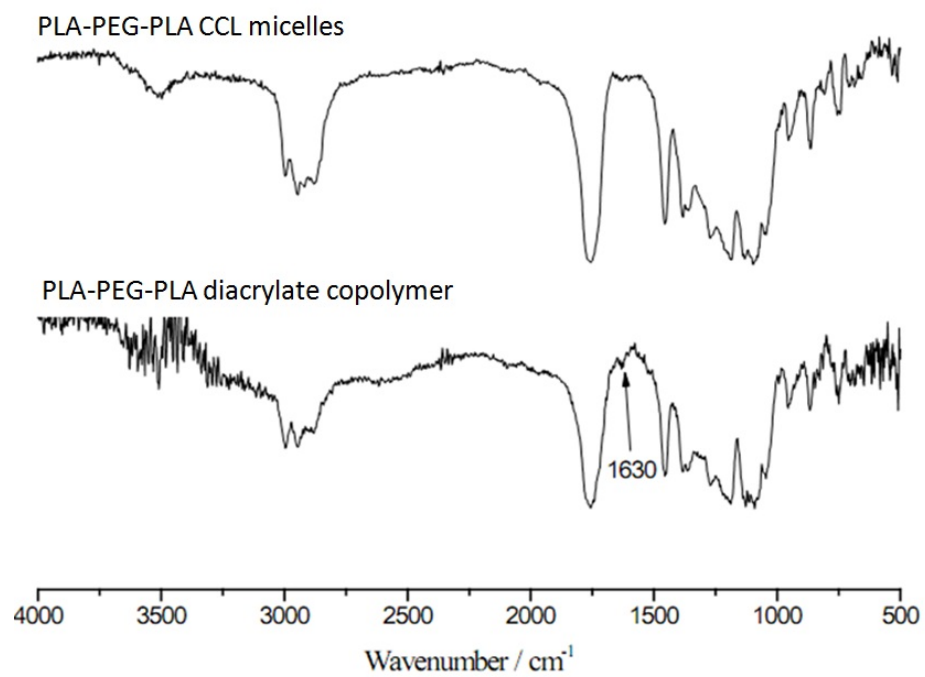

Fig. S3 FTIR spectrum of PLA-PEG-PLA CCL micelles and uncross-linked micelles

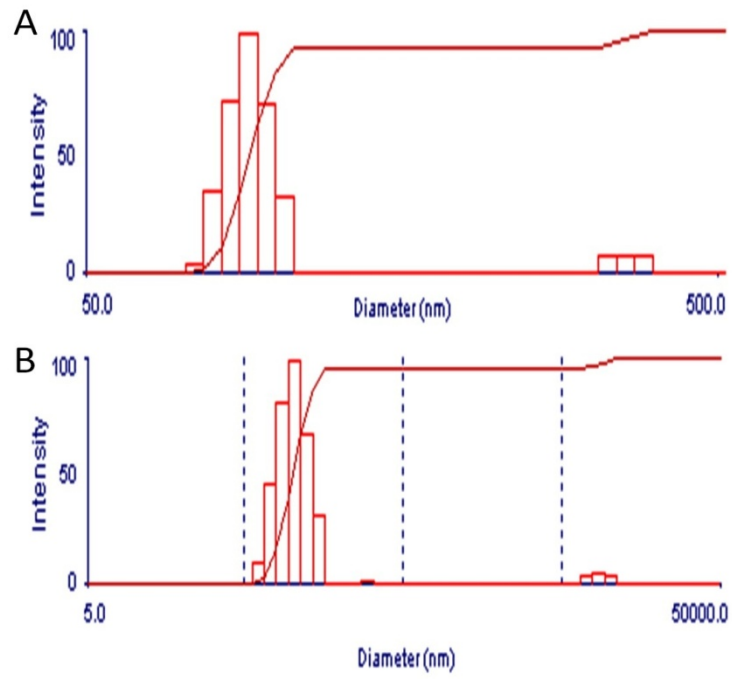

Fig. S4 Polydispersity of PLA-PLA uncross-linked micelles (A) and PLA-PEG SCL micelles

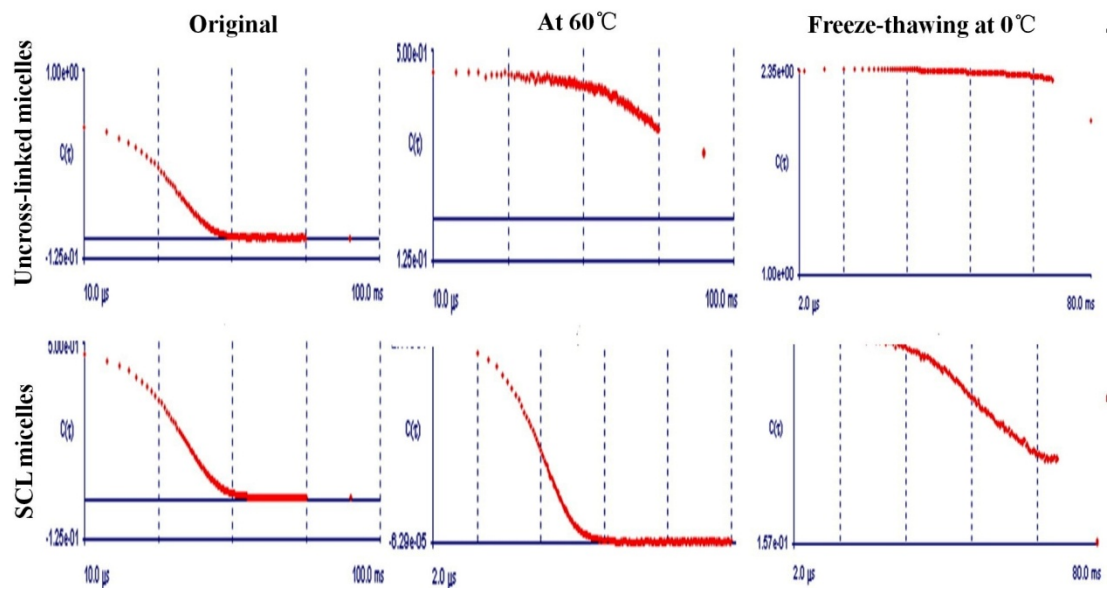

Fig. S5 Stability of PLA-PEG uncross-linked micelles and PLA-PEG SCL micelles at different conditions.

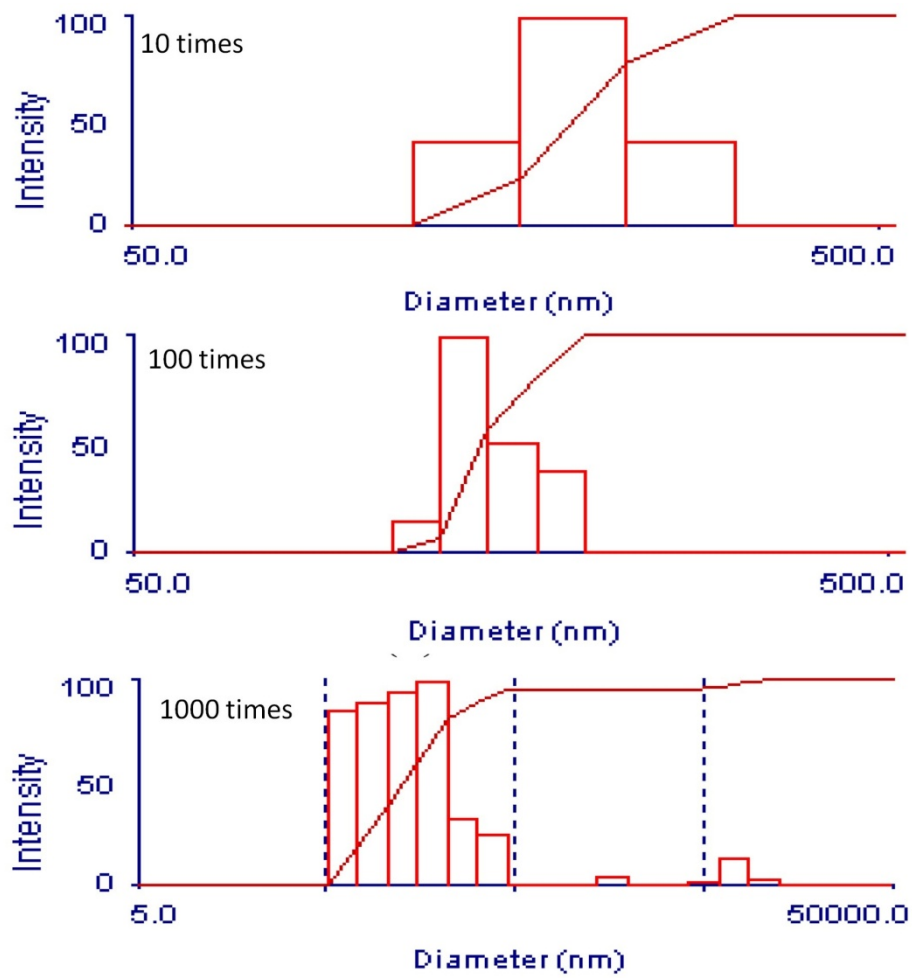

Fig. S6 Size distributions curves of PLA-PEG-PLA CCL micelles after diluting with different times

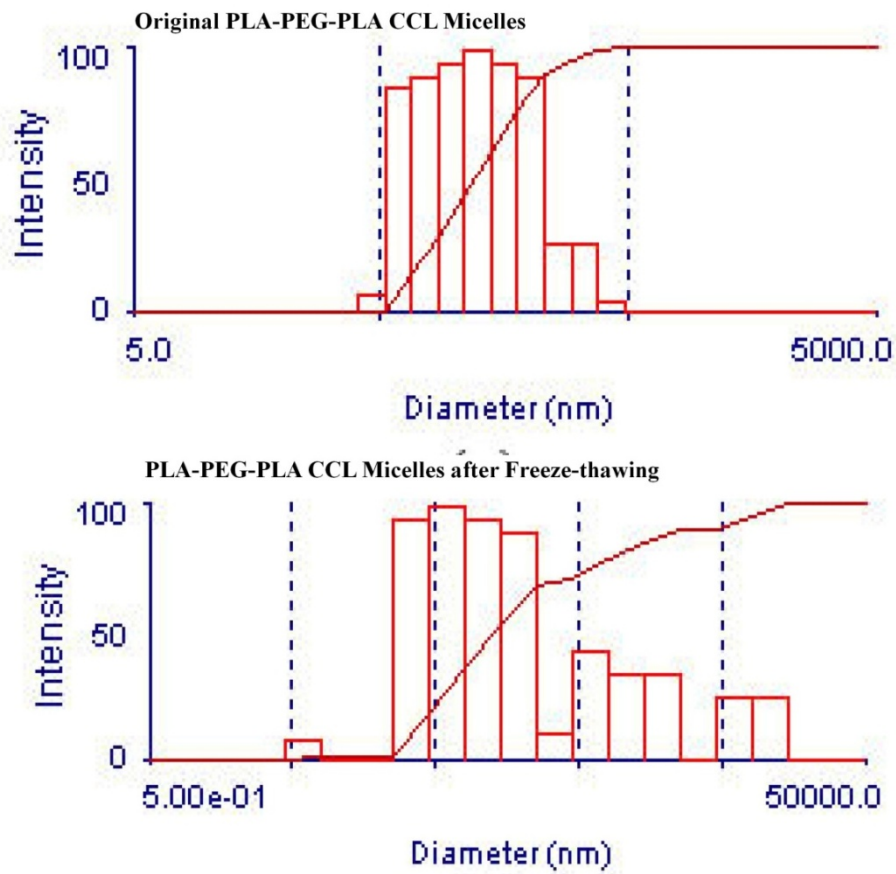

Fig. S7 Size distributions curves of PLA-PEG-PLA CCL micelles before and after freezing-thawing
